# Supplementary material for: Competing bromination and oxidation pathways in acid bromate solutions: an experimental and theoretical studyElectronic supplementary information (ESI) available: details of continuous flow EPR experiments; compound characterisation data (1H NMR, MS) for the bromination of benzaldehyde. See http://www.rsc.org/suppdata/p2/b1/b108009a/
Source: Royal Society of Chemistry journal article supplement (doi:10.1039/b108009a), 2002-01-22
Supplement: b108009a.doc [file b108009a.doc]

# Supplementary data

*Competing bromination and oxidation pathways in acid bromate solutions: an experimental and theoretical study*

G. Rothenberg, R. M. H. Beadnall, J. E. McGrady and J. H. Clark*

*Chemistry Department, University of York, Heslington, York YO10 5DD, UK e-mail jhc1@york.ac.uk*

**Characterisation data for the bromination of benzaldehyde**. The bromination of benzaldehyde was carried out in a similar manner to that of acetophenone. Spectral data: Benzaldehyde M+ 106; *m/z* = 77(100), 105(85), 51(75), 74(17), 39(12), 63(6); H 7.9(d), 7.6–7.4(m). 3-bromobenzaldehyde M+ 186; *m/z* = 77(100), 105(65), 186(54), 51(53), 74(13), 39(6), 63(3). H 8.0(s), 7.8–7.7(m), 7.4(t). 4-bromobenzaldehyde H 7.8–7.6(m). Benzoic acid M+ = 122; m/z = 105(100), 77(92), 51(65), 74(17), 39(13).

**EPR experiments**. Continuous flow EPR measurements were performed using a two-way mixing system. A flow rate of 40 cm3s–1 was maintained using a Watson-Marlow 502s peristaltic pump, positioned on the inlet tubes.[[1]](#footnote-2) The delay time between the mixing and the passage through the EPR cavity was *ca.* 30 ms.

For the flow experiments, two stock solutions were prepared in 1 L pyrex flasks. Soln 1 contained 187.5 g of NaBrO3 dissolved in 500 mL of water, and soln 2 contained 166 mL water, 333 mL 98% H2SO4 and 166 mL (248.8 g) of 3-bromoacetophenone.

**CAUTION!** Care should be taken in preparation of soln 2 (add the acid in small portions to the water), which is best prepared immediately prior to the experiment.

1. B. C. Gilbert, J. R. Lindsay Smith, P. Taylor, S. Ward and A. C. Whitwood, *J. Chem. Soc., Perkin Trans. 2,* 2000, 2001. [↑](#footnote-ref-2)
